# Supplementary material for: HMGA2 drives the IGFBP1/AKT pathway to counteract the increase in P27KIP1 protein levels in mtDNA/RNA‐less cancer cells
Source: PubMed Central journal article supplement — Cancer Sci. 2022 Sep 26;114(1):152–63. doi: 10.1111/cas.15582 (PMC9807519; doi:10.1111/cas.15582), 2022-09-26
Supplement: CAS-114-152-s002.pdf [file CAS-114-152-s002.pdf]

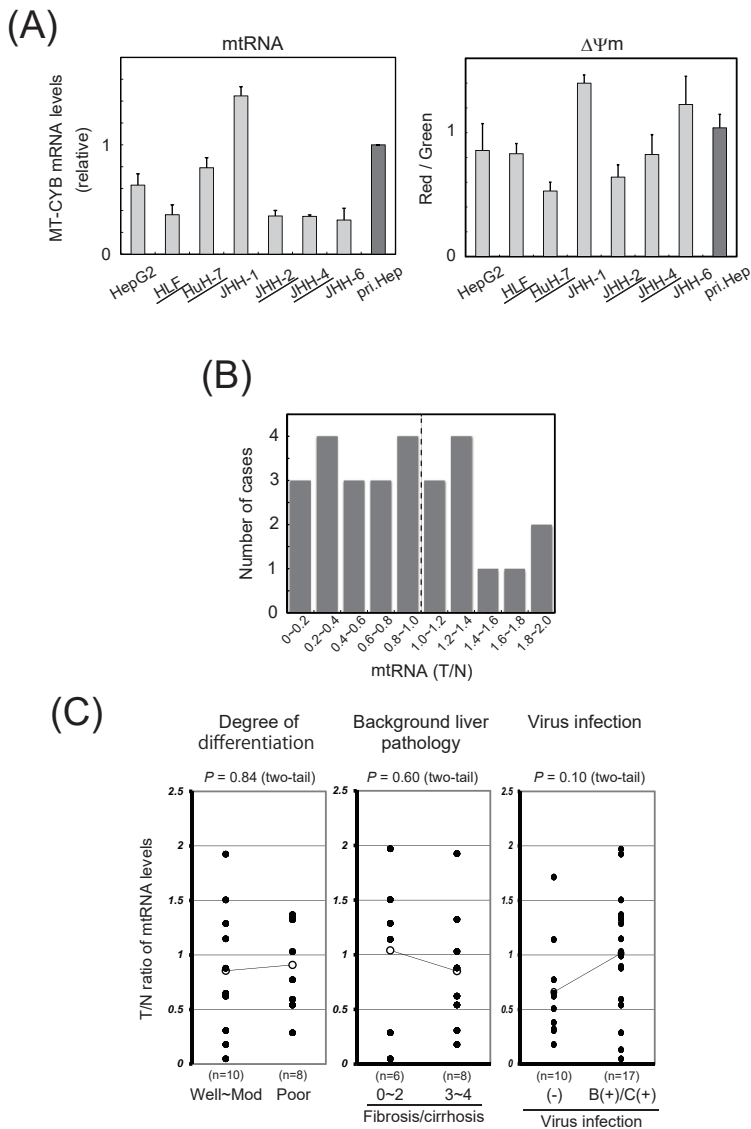**Figure S1.**

Mitochondrial characteristics of HCC cell lines and tissues. **A**, mRNA amounts of the mitochondria-encoded MT-CYB gene were quantified by qPCR in the HCC cell lines. The values were normalized to those of GAPDH and are shown relative to that of pri.Hep. The mitochondrial membrane potential ( $\Delta\Psi m$ ) was determined using the Mito-ID Membrane Potential Cytotoxicity kit (Enzo Life Science, Farmingdale, NY, USA). Cells were loaded with Mito-ID that fluoresces green as a monomer in the cytoplasm or orange as it aggregates in the mitochondria in energized cells, respectively.  $\Delta\Psi m$  was evaluated as a ratio of orange to green fluorescence. The ratios were averaged and are shown relative to those of pri.Hep. Values represent the mean  $\pm$  SD from triplicates. mt-Low cell lines were underlined. **B**, Pairs of HCC tumor (T) and adjacent non-tumorous (N) tissues were obtained from patients (Table S1) and mRNA levels were determined as described in the Materials and Methods. The ratio of the value in T to that in N in each case (T/N) was divided into ranges and the number of cases in each range is indicated. **C**, The T/N ratios of mRNA levels obtained as in **B** were plotted in the group of categories as indicated.
