# Supplementary material for: HMGA2 drives the IGFBP1/AKT pathway to counteract the increase in P27KIP1 protein levels in mtDNA/RNA‐less cancer cells
Source: PubMed Central journal article supplement — Cancer Sci. 2022 Sep 26;114(1):152–63. doi: 10.1111/cas.15582 (PMC9807519; doi:10.1111/cas.15582), 2022-09-26
Supplement: CAS-114-152-s003.pdf [file CAS-114-152-s003.pdf]

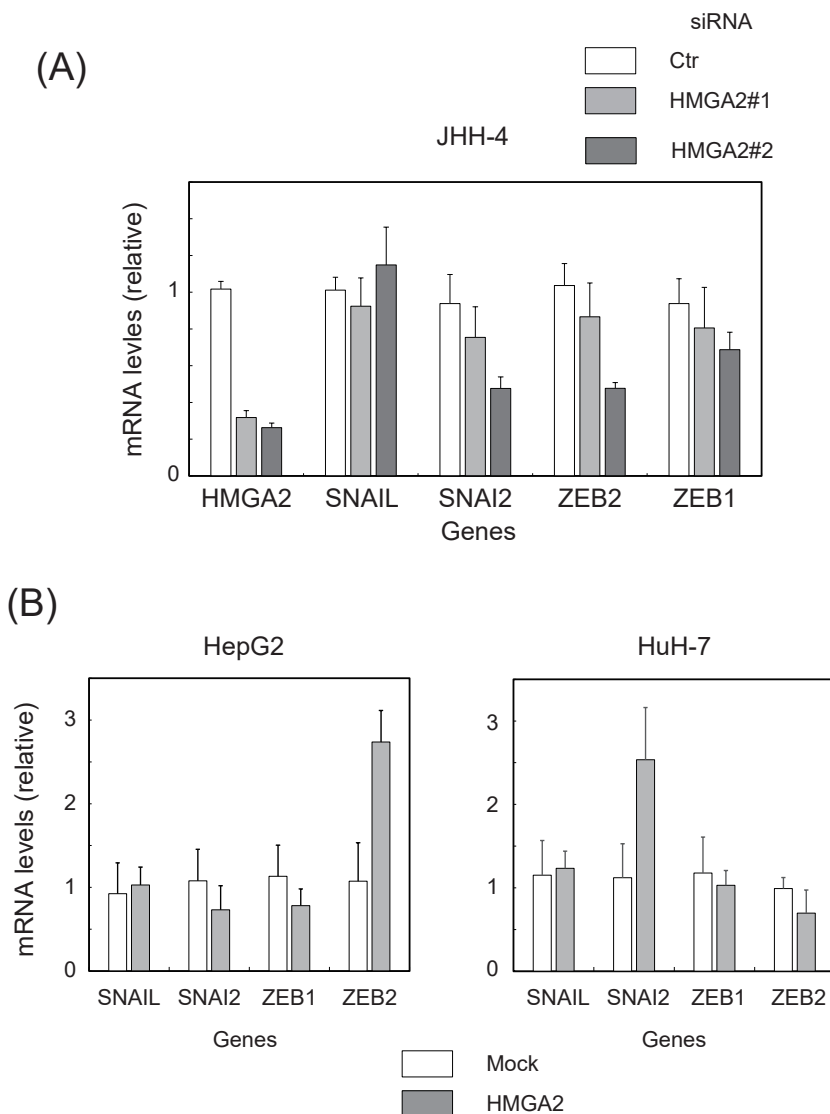**Figure S6.**

HMGA2-knockdown effects on EMT marker gene expression. **A** and **B**, The mRNA levels of each gene were determined by qPCR in JHH-4 cells treated with siRNA for HMGA2 for 72 h (**A**) or in HMGA2-expressing HepG2 and HuH-7 cells (**B**). The values normalized with those of TBP (JHH-4), GAPDH (HepG2), and RNA18SN2 (HuH-7) are shown relative to the control (Ctr; JHH-4, Mock; HepG2 and HuH-7). The values represent the mean  $\pm$  SD from triplicates.
