# Supplementary material for: HMGA2 drives the IGFBP1/AKT pathway to counteract the increase in P27KIP1 protein levels in mtDNA/RNA‐less cancer cells
Source: PubMed Central journal article supplement — Cancer Sci. 2022 Sep 26;114(1):152–63. doi: 10.1111/cas.15582 (PMC9807519; doi:10.1111/cas.15582), 2022-09-26
Supplement: CAS-114-152-s004.pdf [file CAS-114-152-s004.pdf]

Table S2. List of antibodies

| Name of antibody                               | Manufacturer              | Catalog number |
|------------------------------------------------|---------------------------|----------------|
| Immunoblot                                     |                           |                |
| HMGA2                                          | Proteintech               | 20795-1-AP     |
| P27KIP1                                        | BD Pharmingen             | 554069         |
| P27KIP1(phospho S10)                           | abcam                     | Ab62364        |
| p21CIP1                                        | BD Pharmingen             | 556430         |
| Ki67                                           | abcam                     | Ab16667        |
| AKT                                            | Cell Signaling Technology | 9272           |
| p-AKT(S473)                                    | Cell Signaling Technology | 9271           |
| p-AKT(T308)                                    | Cell Signaling Technology | 9275           |
| IGFBP1                                         | Cell Signaling Technology | 31025          |
| IGFBP3                                         | Proteintech               | 10189-2-AP     |
| Lamin A/C                                      | BD Biosciences            | 612162         |
| K48-linkage specific polyubiquitin             | Cell Signaling Technology | 4289           |
| Flag                                           | Merck                     | F3040          |
| $\alpha$ -tubulin                              | Thermo Fisher Scientific  | 13-8000        |
| $\beta$ -actin                                 | Merck                     | A1978          |
| GAPDH                                          | Millipore                 | MAB374         |
| Mouse IgG HRP-linked antibody                  | GE Healthcare             | NA931          |
| Rabbit IgG HRP-linked antibody                 | GE Healthcare             | NA934          |
| Immunocytochemistry                            |                           |                |
| Goat anti-Mouse IgG antibody, Alexa Fluor 488  | Thermo Fisher Scientific  | A-11001        |
| Goat anti-Rabbit IgG antibody, Alexa Fluor 568 | Thermo Fisher Scientific  | A-11011        |
