# Supplementary material for: HMGA2 drives the IGFBP1/AKT pathway to counteract the increase in P27KIP1 protein levels in mtDNA/RNA‐less cancer cells
Source: PubMed Central journal article supplement — Cancer Sci. 2022 Sep 26;114(1):152–63. doi: 10.1111/cas.15582 (PMC9807519; doi:10.1111/cas.15582), 2022-09-26
Supplement: CAS-114-152-s005.pdf [file CAS-114-152-s005.pdf]

(A)

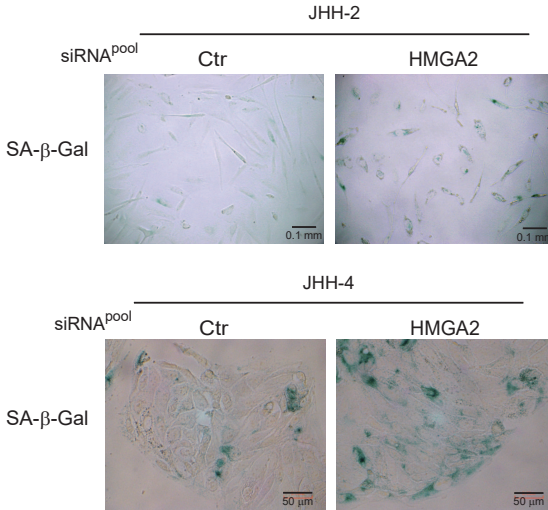

(B)

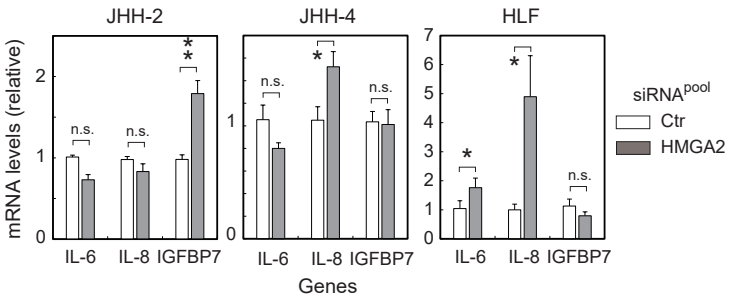**Figure S3.**

HMGA2 knockdown induces senescence-associated phenotypes. **A**, SA-β-Gal staining was performed in JHH-2 and JHH-4 cells incubated with siRNA for one week. **B**, Cells were treated with siRNA for 3 days and qPCR was performed with the primers specific to each gene. The values are shown relative to the control (Ctr) after normalization to the corresponding values to TATA-box binding protein and represent the mean ± SD from triplicates. \*\*P < 0.005; \*P < 0.05; n.s., not significant.
