# Supplementary material for: HMGA2 drives the IGFBP1/AKT pathway to counteract the increase in P27KIP1 protein levels in mtDNA/RNA‐less cancer cells
Source: PubMed Central journal article supplement — Cancer Sci. 2022 Sep 26;114(1):152–63. doi: 10.1111/cas.15582 (PMC9807519; doi:10.1111/cas.15582), 2022-09-26
Supplement: CAS-114-152-s007.pdf [file CAS-114-152-s007.pdf]

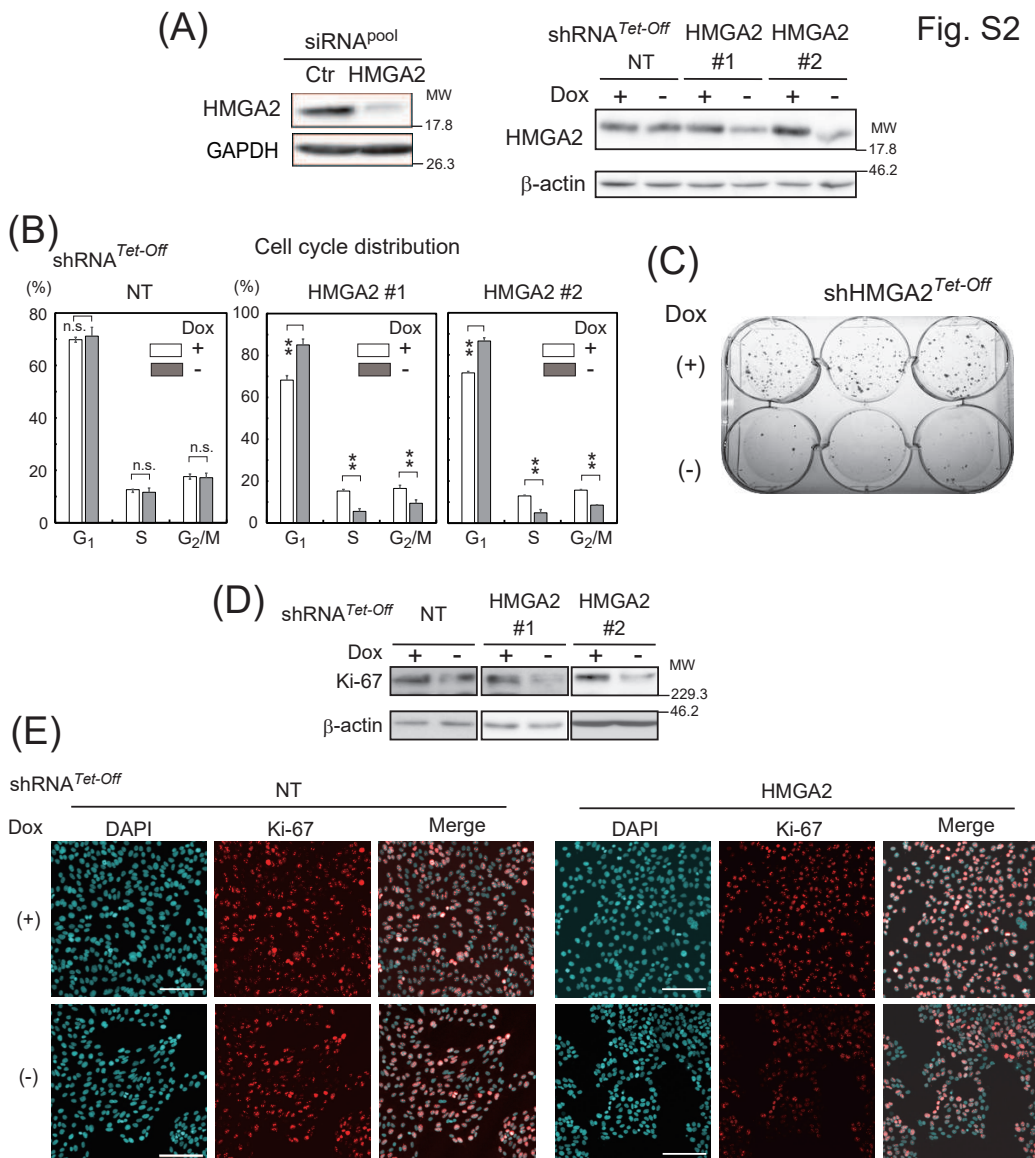**Figure S2.**

HMGA2 knockdown induces cell proliferation inhibition. **A**, HMGA2 was knocked down with siRNA (left) or Dox-responsive shRNA HMGA2#1 and #2 (right) in JHH-4 cells. The controls were scrambled siRNA (Ctr) or non-target shRNA (NT). Cell lysates were prepared after 3 days of siRNA transfection or incubation with (+) or without (-) Dox and subjected to Western blot analysis. GAPDH and β-actin: the loading controls. **B**, The cell cycle analysis was performed with JHH-2 cells expressing Dox-responsive shRNA HMGA2#1 and #2 after incubation with (+) or without (-) Dox for 7 days. \*\*P < 0.005; n.s., not significant. **C**, JHH-4 cells expressing shRNA HMGA2#1 as in A were seeded at a density of 500 cells per well, and colonies formed after two weeks of incubation with (+) or without (-) Dox were stained with crystal violet. **D**, Ki-67 expression levels were examined by Western blot analysis in JHH-4 cells expressing shRNA as in A after one week incubation with (+) or without (-) Dox. β-actin: the loading control. **E**, JHH4 cells expressing shRNA NT or HMGA2#1 as in A were incubated for 7 days with (+) or without (-) Dox and examined by immunocytochemistry using a Ki-67 antibody. The nuclei were labeled with DAPI. Scale bar: 100 μm.
