# Supplementary material for: HMGA2 drives the IGFBP1/AKT pathway to counteract the increase in P27KIP1 protein levels in mtDNA/RNA‐less cancer cells
Source: PubMed Central journal article supplement — Cancer Sci. 2022 Sep 26;114(1):152–63. doi: 10.1111/cas.15582 (PMC9807519; doi:10.1111/cas.15582), 2022-09-26
Supplement: CAS-114-152-s009.pdf [file CAS-114-152-s009.pdf]

(A)

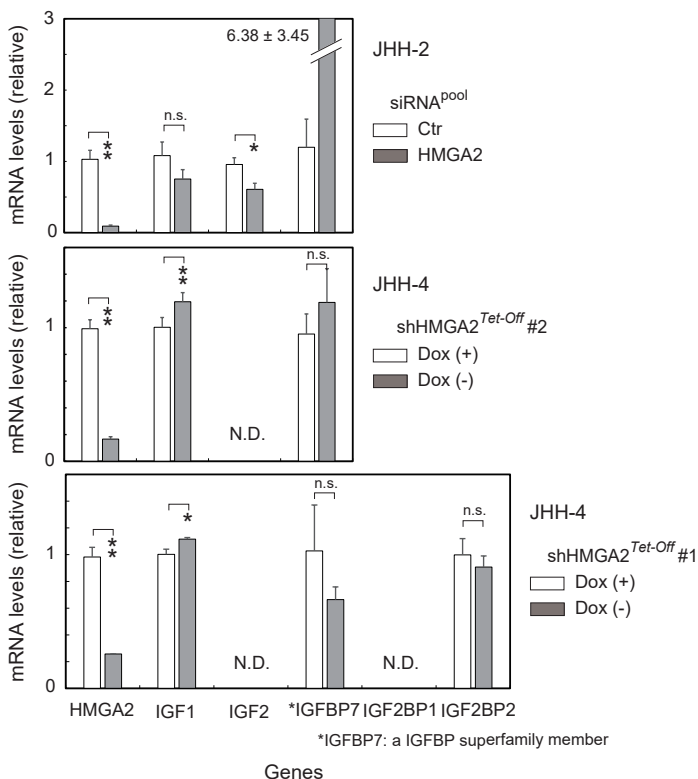

(B)

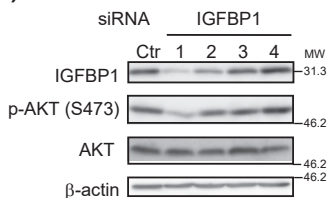**Figure S5.**

HMGA2 knockdown effects on IGF system-related gene expression and IGFBP1 siRNA effect on AKT activity. **A**, HMGA2 was knocked down with siRNA (JHH-2) or Dox-responsive shRNA #1 and #2 (JHH-4) for 3 days. qPCR was performed with the primers specific to each gene. The values are shown relative to the control after normalization to the corresponding values to TATA-box binding protein and represent the mean ± SD from triplicates. N.D., not determined because of low abundance. \*\* $P < 0.005$ ; \* $P < 0.05$ ; n.s., not significant. **B**, JHH-4 cells were treated with four individual siRNAs for IGFBP1 or the control (Ctr) and analyzed by Western blotting after 3 days.
