# Supplementary material for: HMGA2 drives the IGFBP1/AKT pathway to counteract the increase in P27KIP1 protein levels in mtDNA/RNA‐less cancer cells
Source: PubMed Central journal article supplement — Cancer Sci. 2022 Sep 26;114(1):152–63. doi: 10.1111/cas.15582 (PMC9807519; doi:10.1111/cas.15582), 2022-09-26
Supplement: CAS-114-152-s010.pdf [file CAS-114-152-s010.pdf]

Table S1. Characteristics of patients

| Case | Age (years) | Gender | Virus infection <sup>#</sup> | Degree of differentiation | Background liver pathology* | mtRNA <sup>§</sup> (T/N) | HMGA2 expression <sup>¥</sup> | IGFBP1 mRNA (T/N) <sup>@</sup> |
|------|-------------|--------|------------------------------|---------------------------|-----------------------------|--------------------------|-------------------------------|--------------------------------|
| 1    | 69          | F      | C                            | Mod-Poor                  | C (incomplete)              | > 1                      | (-)                           | ND                             |
| 2    | 79          | F      | C                            | Mod-Poor                  | C                           | < 1                      | (-)                           | 0.68                           |
| 3    | 83          | M      | (-)                          | Mod-Poor                  | F                           | > 1                      | (-)                           | 0.08                           |
| 4    | 73          | M      | C                            | -                         | -                           | < 1                      | +                             | 10.27                          |
| 5    | 67          | M      | B                            | Mod                       | C (probable)                | > 1                      | (-)                           | 0.29                           |
| 6    | 74          | M      | (-)                          | -                         | -                           | < 1                      | +                             | 2.43                           |
| 7    | 69          | M      | C                            | -                         | -                           | < 1                      | (-)                           | 1.31                           |
| 8    | 69          | F      | C                            | Mod                       | C (probable)                | < 1                      | +                             | 0.1                            |
| 9    | 69          | M      | C                            | Poor                      | C                           | < 1                      | (-)                           | 1.42                           |
| 10   | 68          | M      | C                            | Mod                       | F2                          | > 1                      | (-)                           | 0.26                           |
| 11   | 84          | M      | (-)                          | -                         | -                           | < 1                      | +                             | 0.56                           |
| 12   | 55          | F      | (-)                          | -                         | -                           | < 1                      | +                             | 0.02                           |
| 13   | 55          | M      | (-)                          | Poor                      | C                           | < 1                      | +                             | 0.02                           |
| 14   | 61          | M      | unknown                      | -                         | -                           | < 1                      | +                             | 0.03                           |
| 15   | 69          | M      | C                            | Well                      | F1~2                        | > 1                      | (-)                           | 0.71                           |
| 16   | 69          | M      | B,C                          | Poor                      | F1                          | < 1                      | +                             | 0.03                           |
| 17   | 71          | M      | C                            | Poor                      | F2                          | > 1                      | (-)                           | 4.99                           |
| 18   | 58          | M      | C                            | Well                      | C (incomplete)              | ND                       | +                             | ND                             |
| 19   | 77          | M      | C                            | Mod                       | F2                          | < 1                      | (-)                           | 0.28                           |
| 20   | 79          | M      | (-)                          | Well-Mod                  | F2                          | ND                       | (-)                           | ND                             |
| 21   | 69          | M      | B,C                          | Mod                       | C                           | > 1                      | (-)                           | 1.66                           |
| 22   | 65          | M      | (-)                          | Well                      | F2                          | < 1                      | +                             | 5.58                           |
| 23   | 69          | M      | (-)                          | Mod                       | F2                          | < 1                      | +                             | 0.02                           |
| 24   | 79          | M      | (-)                          | Well-Mod                  | F2                          | < 1                      | +                             | 0.14                           |
| 25   | 77          | M      | (-)                          | Mod                       | -                           | < 1                      | (-)                           | 2.16                           |
| 26   | 84          | F      | C                            | Poor                      | C                           | > 1                      | +                             | 3.9                            |
| 27   | 75          | F      | C                            | Poor                      | C                           | > 1                      | +                             | 0.5                            |
| 28   | 65          | F      | B                            | Poor                      | F4                          | < 1                      | +                             | 0.04                           |
| 29   | 62          | F      | B                            | Poor                      | F3~4                        | > 1                      | +                             | 5.37                           |
| 30   | 65          | F      | C                            | Poor                      | F4                          | ND                       | +                             | ND                             |
| 31   | 54          | M      | C                            | Mod                       | C                           | ND                       | (-)                           | ND                             |
| 32   | 72          | F      | (-)                          | Mod-Poor                  | F0                          | > 1                      | +                             | 0.08                           |
| 33   | 85          | F      | (-)                          | Mod                       | F0                          | ND                       | (-)                           | ND                             |
| 34   | 50          | M      | C                            | Well-Mod                  | F3                          | ND                       | +                             | ND                             |

<sup>#</sup>Virus infection: B; HBV, C; HCV, (-); negative

<sup>\*</sup>Background of liver pathology: F0~3; staging of fibrosis (F), F4; cirrhosis (C), (-); unknown

<sup>§</sup>mtRNA: mitochondrial transcripts (MT-CYB, MT-ND1, MT-ND6, MT-CO1, MT-ATP6, and MT-ATP8) were quantified, averaged, and normalized with the average of nuclear transcripts (ACTB, B2M, GAPDH, GUSB, HPRT1, RNA18SN2, and TBP) in each sample of a pair of HCC (T) and normal (N) tissues. ND: not determined.

<sup>¥</sup>HMGA2 expression in tumor samples: +/(-); detectable/undetectable signal amplified by qPCR with HMGA2-specific primers

<sup>@</sup>IGFBP1 mRNA expression in tumor samples relative to non-tumorous peritumor samples was analyzed by qPCR.
